# Supplementary material
Source: PubMed Central journal article supplement (PMC9969660)
Supplement: 12889_2023_15223_MOESM1_ESM.pdf [file 12889_2023_15223_MOESM1_ESM.pdf]

# SUPPLEMENTARY MATERIAL

## Ethnic disparities in COVID-19 outcomes: a multinational cohort study of 20 million individuals from England and Canada

### SUPPLEMENTARY METHODS

#### Data sources and study population

##### *QResearch*

The QResearch database (version 45) comprises individuals registered across 1,321 general practices using the Egton Medical Information System (EMIS) software in England, covering 18% of the English population. Anonymised primary care medical records from consenting practices are linked to hospital admission data (including intensive care), mortality data (through the Office for National Statistics), and SARS-CoV-2 national infectious disease surveillance system provided by Public Health England. For this study, we included 9,828,099 adults aged 18 to 99 years contributing to the QResearch database with at least 12 months of continuous prior registration. The study period was the date of the first confirmed SARS-CoV-2 infection in the UK (24<sup>th</sup> January 2020) to 31<sup>st</sup> October 2020.

##### *Ontario*

The population-level healthcare administrative data in Ontario combines the following datasets: Registered Persons Database (RPDB), which includes sociodemographic information; Discharge Abstracts Database (DAD) on all admissions to acute care hospitals as well as ITU attendances; National Ambulatory Care Reporting Service (NACRS), which includes detailed information on all hospital emergency department visits; Ontario Health Insurance Plan (OHIP) for all fee-for-service claims for inpatient and ambulatory care, diagnostic and therapeutic procedures; and the Ontario Laboratory Information System (OLIS), with information on biochemistry, haematology, microbiology and SARS-CoV-2 laboratory test results from all private, hospital and public health laboratories. These datasets were linked using unique encoded identifiers and analysed at ICES (formerly the Institute for Clinical Evaluative Sciences), an independent non-profit research institute. For this study, we included 10,273,496 people aged over 18 years registered to the database on the 25<sup>th</sup> January 2020 who had at least 1 year of prior healthcare eligibility. The study excluded people living in rural areas, as relatively few ethnic minority people live in these areas. The study period was 25<sup>th</sup> January 2020 to 30<sup>th</sup> September 2020.

#### Potential confounders

The available confounders included in the statistical models differed between the QResearch (**Table S1**) and Ontario (**Table S2**) database. The selection of confounders was based on theoretical considerations<sup>1</sup> and empirical evidence from studies investigating the association between ethnicity and COVID-19 outcomes.<sup>2-5</sup>

##### *QResearch*

For the QResearch database, we included the sociodemographic variables: age, sex, deprivation (defined by fifths of the Townsend deprivation, a census-based measure of material deprivation based on a standardised score combining area-

level information on count of households without a car, overcrowded households, households not owner-occupied, and persons unemployed),<sup>6</sup> type of residence (care home, homeless, or neither), and household size (count of patients at a particular household ID among those registered at the practice). Lifestyle variables included body mass index (BMI) and smoking status (current smoker, ex-smoker or non-smoker). The following co-morbidities were included at study entry: asthma, chronic obstructive pulmonary disease (COPD), hypertension, coronary heart disease, stroke, atrial fibrillation (AF), congestive cardiac failure (CCF), diabetes, chronic kidney disease (stages 3-5), severe mental illness, Parkinson's disease, epilepsy, dementia, rare neurological diseases, learning disability, cerebral palsy, pulmonary hypertension/fibrosis, rheumatoid arthritis/systemic lupus erythematosus (SLE), liver diseases (cirrhosis/non-alcoholic fatty liver disease (NALFD), sickle cell disease, venous thromboembolism (VTE)/peripheral vascular disease (PVD), cancer (blood/respiratory), immunosuppression, solid/bone marrow transplant. The clinical codes in the primary care and hospital records used to identify the medical conditions and medications are available at: <https://www.qresearch.org/data/qcode-group-library/>.

### Ontario

In the Ontario linked healthcare administrative database, sociodemographic variables included: age, sex, deprivation (defined by the material deprivation quintile measure from the Ontario Marginalization Index; the material deprivation indicator is based on the proportions of: (a) the population aged 20+ without a high-school diploma; (b) families who are lone parent families; (c) total income from government transfer payments for population aged 15+; (d) the population aged 15+ who are unemployed; (e) the population considered low-income; (f) households living in dwellings that are in need of major repair),<sup>7</sup> and residence in a long-term care facility such as nursing home/care home. Co-morbidities included: asthma, COPD, hypertension, coronary heart disease, cerebrovascular disease, atrial fibrillation, congestive heart failure, diabetes, chronic kidney disease, dementia, rheumatoid arthritis, liver disease, sickle cell disease, cancer, solid organ or bone marrow transplant, inflammatory bowel disease, and HIV. Lifestyle data including BMI and smoking status are not available in Ontario administrative data. The clinical codes used to identify the medical conditions are those reported in the table below or in the related reference:

|                        |                                                                                                                                                                                                                                  |
|------------------------|----------------------------------------------------------------------------------------------------------------------------------------------------------------------------------------------------------------------------------|
| Asthma                 | Gershon AS et al. <i>Can Respir J</i> 2009;16:183-8                                                                                                                                                                              |
| COPD                   | Gershon AS et al. <i>COPD</i> 2009;6(5):388-94                                                                                                                                                                                   |
| Hypertension           | Tu K et al. <i>Open Med</i> 2007;1(1):18-26.                                                                                                                                                                                     |
| Coronary heart disease | ICD-10 codes I20, I21, I22, I25 in prior 5 years; OR CCP codes 48.02, 48.03, 48.1 OR CCI codes 1.IJ.50, 1.IJ.57, 1.IJ.76 in prior 20 years                                                                                       |
| Stroke                 | ICD-10 codes G45.0, G45.1, G45.2, G45.3, G45.8, G45.9, H34.0, H34.1, I63, I64 in prior 5 years                                                                                                                                   |
| Atrial fibrillation    | ICD-9 code 427.3 OR ICD-10 code I48 in prior 20 years                                                                                                                                                                            |
| CHF                    | Schultz SE et al. <i>Chronic Dis Inj Can</i> 2013;33(3):160-6                                                                                                                                                                    |
| Diabetes               | Lipscombe LL et al. <i>BMC Health Serv Res</i> 2018;18:316                                                                                                                                                                       |
| CKD                    | Fleet JL et al. <i>BMC Nephrol</i> 2013;14:81                                                                                                                                                                                    |
| Dementia               | Jaakkimainen RL et al. <i>J Alzheim Dis</i> 2016;54:337-49                                                                                                                                                                       |
| Rheumatoid arthritis   | Widdifield J et al. <i>BMC Musculoskel Dis</i> 2014;15(1):216                                                                                                                                                                    |
| Liver cirrhosis        | Lapointe-Shaw L et al. <i>PLoS One</i> 2018;13(8):e0201120                                                                                                                                                                       |
| Sickle cell disease    | ICD-9 code 282.6 OR ICD-10 code D57.0, D57.1, D57.2, D57.8 in prior 20 years                                                                                                                                                     |
| Cancer                 | ICD-9 code 140–239 OR ICD-10 code C01–C99 in prior 20 years                                                                                                                                                                      |
| Transplant             | Record in solid organ transplant registry prior to Dec 2018; OR CCI codes 1.PC.85, 1.HZ.85, 1.GR.85, 1.GT.85, 1.HY.85, 1.OA.85, 1.OK.85, 1.OB.85 after Jan 2019; OR CCP code 53.0 or CCI code 1.WY.19, 1.LZ.19 in prior 20 years |
| Crohn's and colitis    | Benchimol EI et al. <i>J Clin Epi</i> 2014;67(8):887-96                                                                                                                                                                          |
| HIV                    | Gershon AS et al. <i>PLoS One</i> 2011;6(6):e21748                                                                                                                                                                               |

ICD-9 = International Classification of Diseases, 9th edition; ICD-10 = International Classification of Diseases, 10th edition  
CCP = Canadian Classifications of Diagnostic, Therapeutic and Surgical Procedures; CCI = Canadian Classification of Health Interventions

## REFERENCES

1. VanderWeele TJ. Principles of confounder selection. *European Journal of Epidemiology* 2019;34(3):211-19. doi: 10.1007/s10654-019-00494-6
2. Sze S, Pan D, Nevill CR, et al. Ethnicity and clinical outcomes in COVID-19: A systematic review and meta-analysis. *EClinicalMedicine* 2020;29:100630. doi: 10.1016/j.eclinm.2020.100630 [published Online First: 2020/11/18]
3. Mathur R, Rentsch CT, Morton CE, et al. Ethnic differences in SARS-CoV-2 infection and COVID-19-related hospitalisation, intensive care unit admission, and death in 17 million adults in England: an observational cohort study using the OpenSAFELY platform. *Lancet* 2021;397(10286):1711-24. doi: 10.1016/S0140-6736(21)00634-6 [published Online First: 2021/05/04]
4. Rentsch CT, Kidwai-Khan F, Tate JP, et al. Patterns of COVID-19 testing and mortality by race and ethnicity among United States veterans: A nationwide cohort study. *PLOS Medicine* 2020;17(9):e1003379. doi: 10.1371/journal.pmed.1003379
5. Yates T, Summerfield A, Razieh C, et al. A population-based cohort study of obesity, ethnicity and COVID-19 mortality in 12.6 million adults in England. *Nat Commun* 2022;13(1):624. doi: 10.1038/s41467-022-28248-1 [published Online First: 2022/02/04]
6. Townsend P, Phillimore P, Beattie A. Health and deprivation: inequality and the North Croom Helm: London. *Health Policy* 1988;10:207-06.
7. 2016 Ontario Marginalization Index: Public Health Ontario; [Available from: <https://www.publichealthontario.ca/-/media/documents/O/2017/on-marg-userguide.pdf> accessed 22 May 2021].

**Table S1: Baseline characteristics by ethnic groups (QResearch cohort)**

| Characteristics                           |                                 | General population | South Asian   | Chinese      |
|-------------------------------------------|---------------------------------|--------------------|---------------|--------------|
| <b>Subjects (N)</b>                       |                                 | 7160034            | 585810        | 96391        |
| <b>Age (yr)</b>                           | Mean (SD)                       | 48.8 (18.6)        | 42.2 (15.5)   | 36.8 (14.9)  |
|                                           | 18-29                           | 1276233 (17.8)     | 123062 (21.0) | 39991 (41.5) |
|                                           | 30-39                           | 1368700 (19.1)     | 169519 (28.9) | 24230 (25.1) |
|                                           | 40-49                           | 1194140 (16.7)     | 134322 (22.9) | 13938 (14.5) |
|                                           | 50-59                           | 1214588 (17.0)     | 70854 (12.1)  | 8339 (8.7)   |
|                                           | 60-69                           | 919757 (12.8)      | 48972 (8.4)   | 5974 (6.2)   |
|                                           | 70-79                           | 734443 (10.3)      | 24093 (4.1)   | 2667 (2.8)   |
|                                           | 80-89                           | 361985 (5.1)       | 13050 (2.2)   | 1073 (1.1)   |
|                                           | 90-99                           | 90188 (1.3)        | 1938 (0.3)    | 179 (0.2)    |
| <b>Sex</b>                                | Female                          | 3713017 (51.9)     | 277696 (47.4) | 52109 (54.1) |
|                                           | Male                            | 3447017 (48.1)     | 308114 (52.6) | 44282 (45.9) |
| <b>Deprivation</b>                        | Quintile 1 (least deprived)     | 1637140 (22.9)     | 48894 (8.3)   | 8851 (9.2)   |
|                                           | Quintile 2                      | 1566234 (21.9)     | 73845 (12.6)  | 11794 (12.2) |
|                                           | Quintile 3                      | 1399191 (19.5)     | 121025 (20.7) | 13612 (14.1) |
|                                           | Quintile 4                      | 1286957 (18.0)     | 164561 (28.1) | 20284 (21.0) |
|                                           | Quintile 5 (most deprived)      | 1229106 (17.2)     | 174538 (29.8) | 40156 (41.7) |
|                                           | Not recorded                    | 41406 (0.6)        | 2947 (0.5)    | 1694 (1.8)   |
| <b>Household size</b>                     | 1 person                        | 2623540 (36.6)     | 149168 (25.5) | 42617 (44.2) |
|                                           | 2 people                        | 1933609 (27.0)     | 96118 (16.4)  | 16816 (17.4) |
|                                           | 3-5 people                      | 2278888 (31.8)     | 251363 (42.9) | 25820 (26.8) |
|                                           | 6-9 people                      | 230175 (3.2)       | 77453 (13.2)  | 4823 (5.0)   |
|                                           | 10 or more                      | 93822 (1.3)        | 11708 (2.0)   | 6315 (6.6)   |
| <b>Home type</b>                          | Neither                         | 7094991 (99.1)     | 583673 (99.6) | 96260 (99.9) |
|                                           | Care home                       | 49493 (0.7)        | 1418 (0.2)    | 112 (0.1)    |
|                                           | Homeless                        | 15550 (0.2)        | 719 (0.1)     | 19 (0.0)     |
| <b>Body mass index (kg/m<sup>2</sup>)</b> | <18.5                           | 185678 (2.6)       | 22618 (3.9)   | 7335 (7.6)   |
|                                           | 18.5-25                         | 2458957 (34.3)     | 201759 (34.4) | 50574 (52.5) |
|                                           | 25-30                           | 2110485 (29.5)     | 183205 (31.3) | 14168 (14.7) |
|                                           | 30-35                           | 998630 (13.9)      | 72090 (12.3)  | 2656 (2.8)   |
|                                           | 35-40                           | 382674 (5.3)       | 21746 (3.7)   | 555 (0.6)    |
|                                           | ≥40                             | 194536 (2.7)       | 8299 (1.4)    | 222 (0.2)    |
|                                           | Not recorded                    | 829074 (11.6)      | 76093 (13.0)  | 20881 (21.7) |
| <b>Smoking</b>                            | Non-smoker                      | 4060877 (56.7)     | 445549 (76.1) | 76445 (79.3) |
|                                           | Ex-smoker                       | 1661661 (23.2)     | 49342 (8.4)   | 7372 (7.6)   |
|                                           | Current smoker                  | 1240714 (17.3)     | 67022 (11.4)  | 7774 (8.1)   |
|                                           | Not recorded                    | 196782 (2.7)       | 23897 (4.1)   | 4800 (5.0)   |
| <b>Comorbidities</b>                      | Asthma                          | 1040959 (14.5)     | 68826 (11.7)  | 4164 (4.3)   |
|                                           | COPD                            | 190894 (2.7)       | 4301 (0.7)    | 193 (0.2)    |
|                                           | Hypertension                    | 1294592 (18.1)     | 82177 (14.0)  | 5253 (5.4)   |
|                                           | Coronary heart disease          | 265163 (3.7)       | 20837 (3.6)   | 616 (0.6)    |
|                                           | Stroke                          | 163596 (2.3)       | 7284 (1.2)    | 380 (0.4)    |
|                                           | Atrial fibrillation             | 187481 (2.6)       | 3349 (0.6)    | 365 (0.4)    |
|                                           | Congestive cardiac failure      | 90070 (1.3)        | 4527 (0.8)    | 151 (0.2)    |
|                                           | Diabetes                        | 501791 (7.0)       | 77142 (13.2)  | 2925 (3.0)   |
|                                           | Chronic kidney disease          | 303188 (4.2)       | 15990 (2.7)   | 715 (0.7)    |
|                                           | Severe mental illness           | 870409 (12.2)      | 33269 (5.7)   | 2202 (2.3)   |
|                                           | Parkinson's disease             | 19713 (0.3)        | 776 (0.1)     | 65 (0.1)     |
|                                           | Epilepsy                        | 103177 (1.4)       | 4802 (0.8)    | 182 (0.2)    |
|                                           | Dementia                        | 78066 (1.1)        | 2977 (0.5)    | 154 (0.2)    |
|                                           | Rare neurological diseases      | 23650 (0.3)        | 644 (0.1)     | 42 (0.0)     |
|                                           | Learning disability             | 134687 (1.9)       | 7781 (1.3)    | 355 (0.4)    |
|                                           | Cerebral palsy                  | 8161 (0.1)         | 495 (0.1)     | 16 (0.0)     |
|                                           | Pulmonary hypertension/fibrosis | 13444 (0.2)        | 766 (0.1)     | 41 (0.0)     |
|                                           | Rheumatoid arthritis/SLE        | 75355 (1.1)        | 5510 (0.9)    | 352 (0.4)    |
|                                           | Liver cirrhosis/NAFLD           | 139525 (1.9)       | 18824 (3.2)   | 1046 (1.1)   |
|                                           | Sickle cell disease             | 3059 (0.0)         | 110 (0.0)     | <5           |
|                                           | VTE/PVD                         | 188339 (2.6)       | 6344 (1.1)    | 205 (0.2)    |
|                                           | Cancer (blood & respiratory)    | 54520 (0.8)        | 2118 (0.4)    | 220 (0.2)    |
|                                           | Immunosuppression               | 89448 (1.2)        | 5406 (0.9)    | 418 (0.4)    |
|                                           | Transplant                      | 8270 (0.1)         | 780 (0.1)     | 52 (0.1)     |

COPD – chronic obstructive pulmonary disease; SLE – systemic lupus erythematosus; NAFLD – Non-alcoholic fatty liver disease; VTE – venous thromboembolism; PVD – peripheral vascular disease. Cells less than 5 are suppressed.

**Table S2: Baseline characteristics by ethnic groups (Ontario cohort)**

| Characteristics      |                                    | General population | South Asian    | Chinese        |
|----------------------|------------------------------------|--------------------|----------------|----------------|
| <b>Subjects (N)</b>  |                                    | 9180377            | 454694         | 638425         |
| <b>Age (years)</b>   | Mean (SD)                          | 48.9 (18.6)        | 45.6 (17.3)    | 48.3 (17.8)    |
|                      | 18-29                              | 1722979 (18.8%)    | 90393 (19.9%)  | 114316 (17.9%) |
|                      | 30-39                              | 1546755 (16.8%)    | 102788 (22.6%) | 114654 (18.0%) |
|                      | 40-49                              | 1487156 (16.2%)    | 87984 (19.4%)  | 108974 (17.1%) |
|                      | 50-59                              | 1639115 (17.9%)    | 68922 (15.2%)  | 126414 (19.8%) |
|                      | 60-69                              | 1365884 (14.9%)    | 52798 (11.6%)  | 90451 (14.2%)  |
|                      | 70-79                              | 886902 (9.7%)      | 35728 (7.9%)   | 51199 (8.0%)   |
|                      | 80-89                              | 423745 (4.6%)      | 13859 (3.0%)   | 26649 (4.2%)   |
|                      | 90-99                              | 107841 (1.2%)      | 2222 (0.5%)    | 5768 (0.9%)    |
| <b>Sex</b>           | Female                             | 4735518 (51.6%)    | 225753 (49.6%) | 340305 (53.3%) |
|                      | Male                               | 4444859 (48.4%)    | 228941 (50.4%) | 298120 (46.7%) |
| <b>Deprivation</b>   | Quintile 1 (least deprived)        | 2241122 (24.4%)    | 84292 (18.5%)  | 171571 (26.9%) |
|                      | Quintile 2                         | 1901861 (20.7%)    | 87244 (19.2%)  | 163677 (25.6%) |
|                      | Quintile 3                         | 1678636 (18.3%)    | 109029 (24.0%) | 109502 (17.2%) |
|                      | Quintile 4                         | 1613406 (17.6%)    | 101217 (22.3%) | 99293 (15.6%)  |
|                      | Quintile 5 (most deprived)         | 1745352 (19.0%)    | 72912 (16.0%)  | 94382 (14.8%)  |
| <b>Home type</b>     | Long-term care resident            | 63810 (0.7%)       | 767 (0.2%)     | 2635 (0.4%)    |
| <b>Comorbidities</b> | Asthma                             | 1487766 (16.2%)    | 64143 (14.1%)  | 55711 (8.7%)   |
|                      | COPD                               | 242774 (2.6%)      | 3848 (0.8%)    | 5955 (0.9%)    |
|                      | Hypertension                       | 2484081 (27.1%)    | 116975 (25.7%) | 134517 (21.1%) |
|                      | Coronary heart disease             | 290147 (3.2%)      | 14535 (3.2%)   | 6330 (1.0%)    |
|                      | Stroke                             | 76964 (0.8%)       | 2347 (0.5%)    | 2518 (0.4%)    |
|                      | Atrial fibrillation                | 171981 (1.9%)      | 3256 (0.7%)    | 4472 (0.7%)    |
|                      | Congestive cardiac failure         | 227978 (2.5%)      | 7626 (1.7%)    | 5788 (0.9%)    |
|                      | Diabetes                           | 1157417 (12.6%)    | 87099 (19.2%)  | 70933 (11.1%)  |
|                      | Chronic kidney disease             | 243520 (2.7%)      | 12004 (2.6%)   | 11855 (1.9%)   |
|                      | Dementia                           | 161180 (1.8%)      | 3998 (0.9%)    | 6666 (1.0%)    |
|                      | Rheumatoid arthritis               | 110617 (1.2%)      | 5144 (1.1%)    | 3366 (0.5%)    |
|                      | Liver cirrhosis                    | 49932 (0.5%)       | 1559 (0.3%)    | 1908 (0.3%)    |
|                      | Sickle cell disease                | 2132 (0.0%)        | 18 (0.0%)      | 11 (0.0%)      |
|                      | Cancer (solid organ/hematopoietic) | 2858051 (31.1%)    | 89299 (19.6%)  | 155518 (24.4%) |
|                      | Transplant (marrow/solid)          | 12505 (0.1%)       | 510 (0.1%)     | 584 (0.1%)     |
|                      | Crohn's & colitis                  | 80328 (0.9%)       | 2850 (0.6%)    | 1109 (0.2%)    |
|                      | HIV                                | 18440 (0.2%)       | 350 (0.1%)     | 482 (0.1%)     |

COPD – chronic obstructive pulmonary disease; HIV – human immunodeficiency virus.

Figure S1: Adjusted hazard ratios for COVID-19 death in QResearch and Ontario cohorts

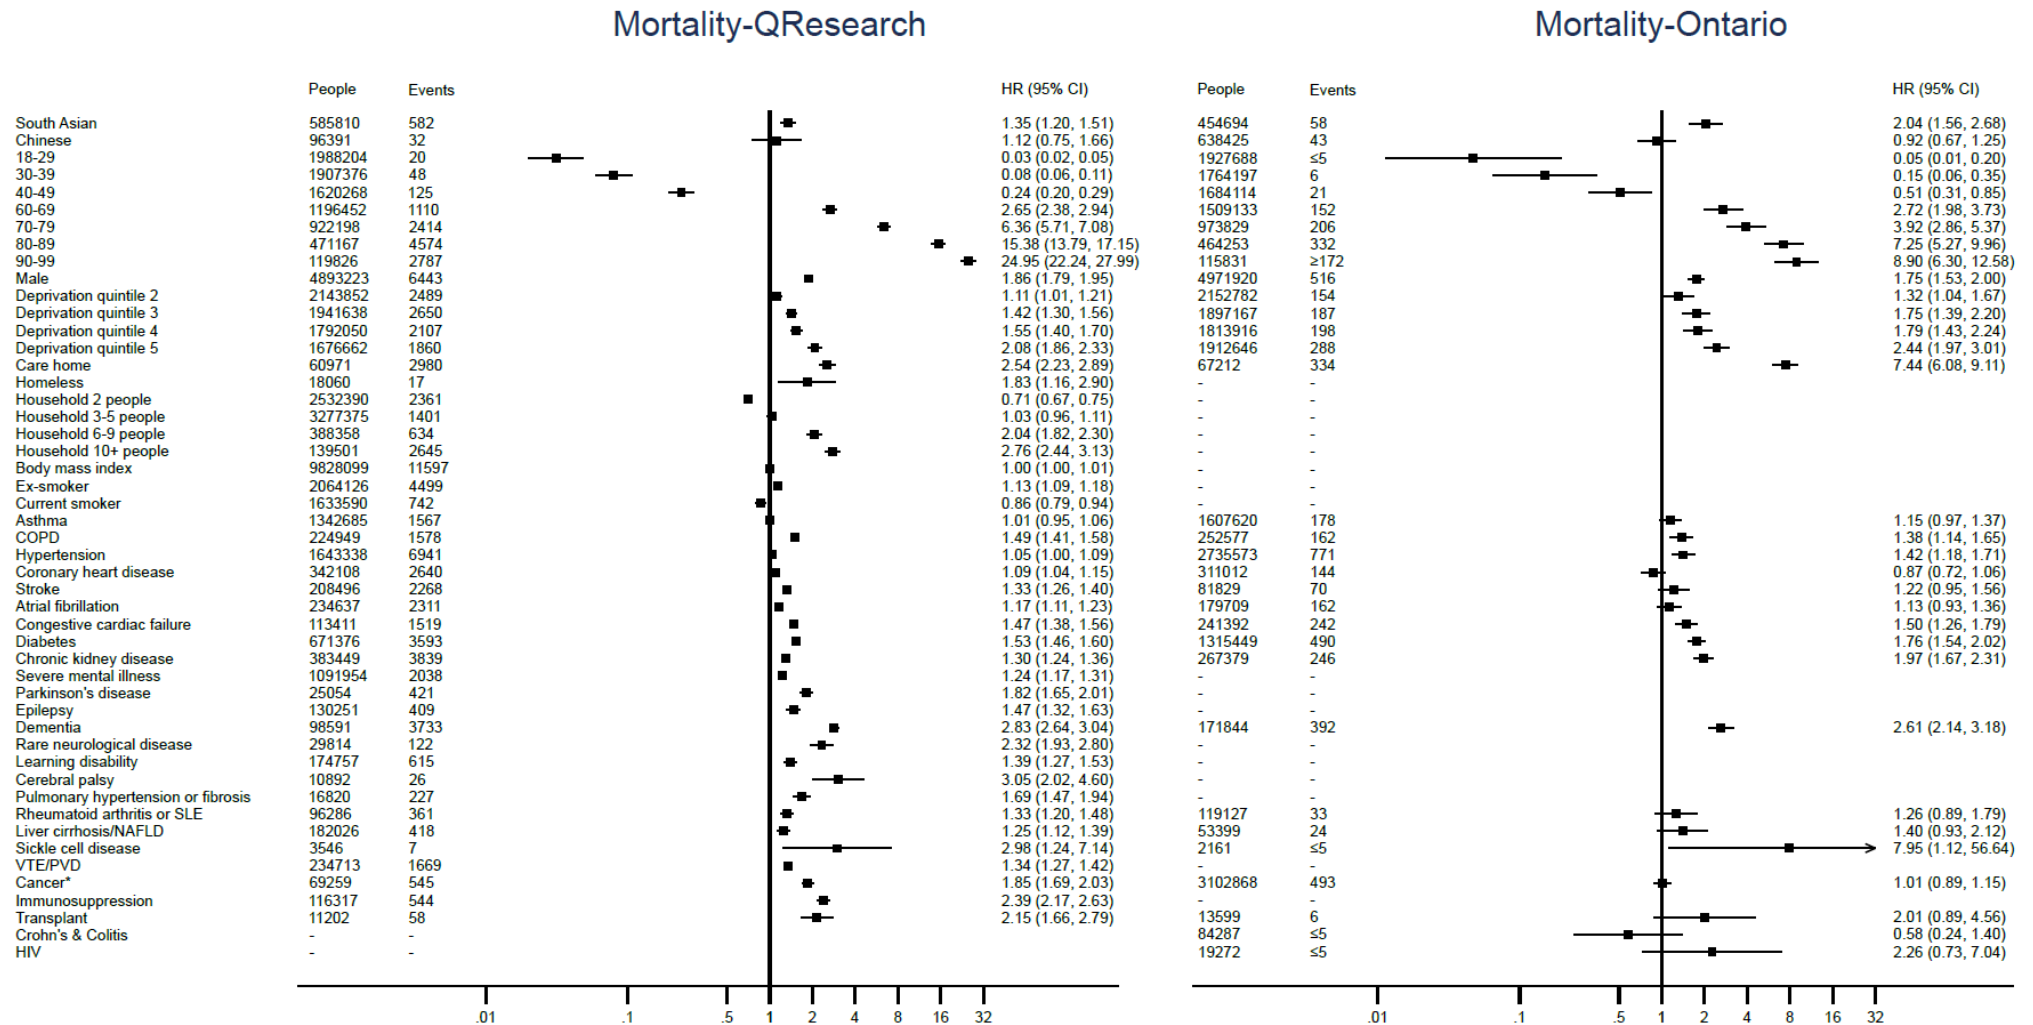

Number of events and participants refer to complete-case data (Table 1, Table S1 and Table S2)

Rheumatoid arthritis alone in Ontario cohort. \*Blood/respiratory cancer in QResearch, all cancer types in Ontario cohort.

The reference ethnic group is "general population": people not South Asian and Chinese - Ontario: approximately 80% White; QResearch; White, Other Asian, Black African, Black Caribbean, and Other. COPD – chronic obstructive pulmonary disease; SLE – systemic lupus erythematosus; NAFLD – Non-alcoholic fatty liver disease; VTE – venous thromboembolism; PVD – peripheral vascular disease; HIV – human immunodeficiency virus. Reference groups are: Ethnicity – White; Age – 50-59 years; Sex – Female; Deprivation – 1<sup>st</sup> quintile (least deprived); Residence – neither (QResearch), no long-term care resident (Ontario); Household size – 1 person; Smoking status – non-smoker. For body mass index (BMI, kg/m<sup>2</sup>), hazard ratio is reported per 1-unit increase. For all comorbidities, reference is no disease (for chronic kidney disease [CKD] it is CKD stage 1-2)

Figure S2: Adjusted hazard ratios for COVID-19 hospitalisation in QResearch and Ontario cohorts

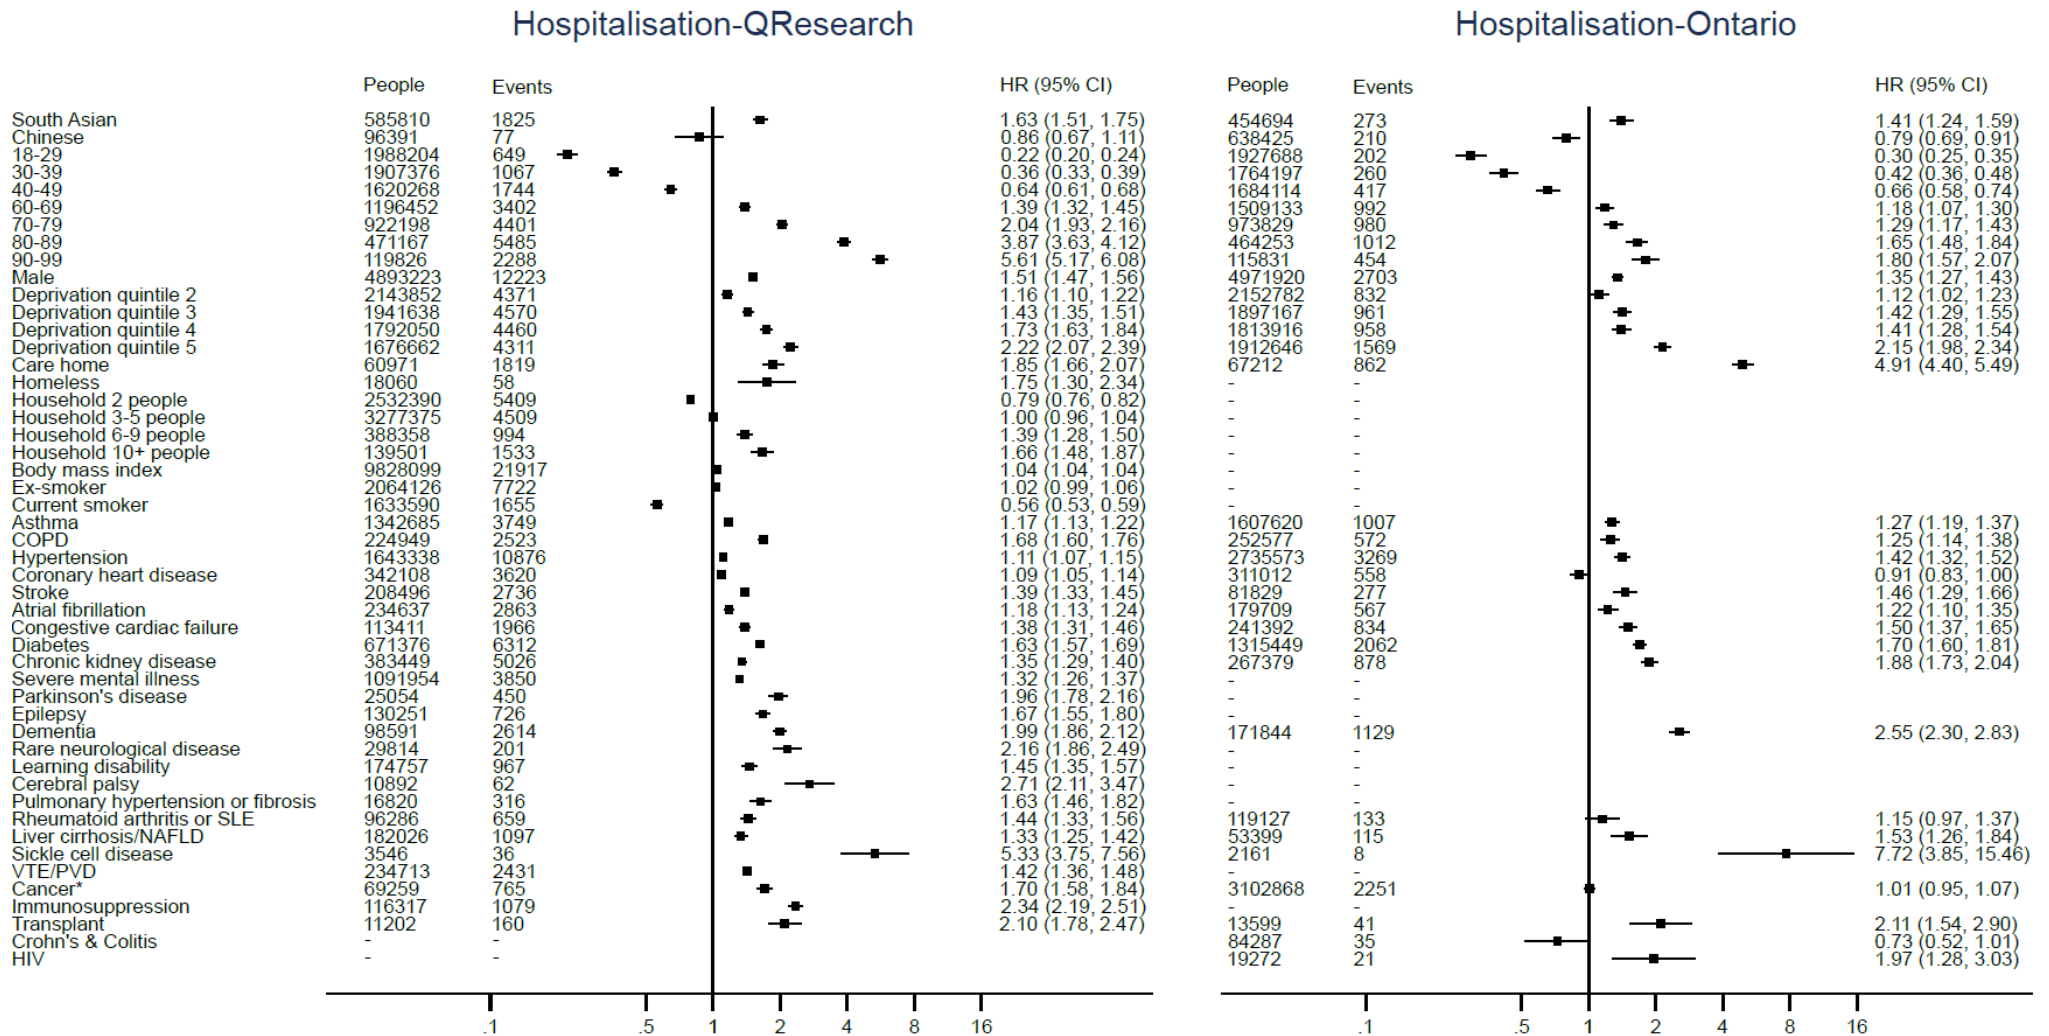

Number of events and participants refer to complete-case data (Table 1, Table S1 and Table S2)

Rheumatoid arthritis alone in Ontario cohort. \*Blood/respiratory cancer in QResearch, all cancer types in Ontario cohort.

The reference ethnic group is "general population": people not South Asian and Chinese - Ontario: approximately 80% White; QResearch; White, Other Asian, Black African, Black Caribbean, and Other.

COPD – chronic obstructive pulmonary disease; SLE – systemic lupus erythematosus; NAFLD – Non-alcoholic fatty liver disease; VTE – venous thromboembolism; PVD – peripheral vascular disease; HIV – human immunodeficiency virus. Reference groups are: Ethnicity – White; Age – 50-59 years; Sex – Female; Deprivation – 1<sup>st</sup> quintile (least deprived); Residence – neither (QResearch), no long-term care resident (Ontario); Household size – 1 person; Smoking status – non-smoker. For body mass index (BMI, kg/m<sup>2</sup>), hazard ratio is reported per 1-unit increase. For all comorbidities, reference is no disease (for chronic kidney disease [CKD] it is CKD stage 1-2)

Figure S3: Adjusted hazard ratios for COVID-19 ICU admission in QResearch and Ontario cohorts

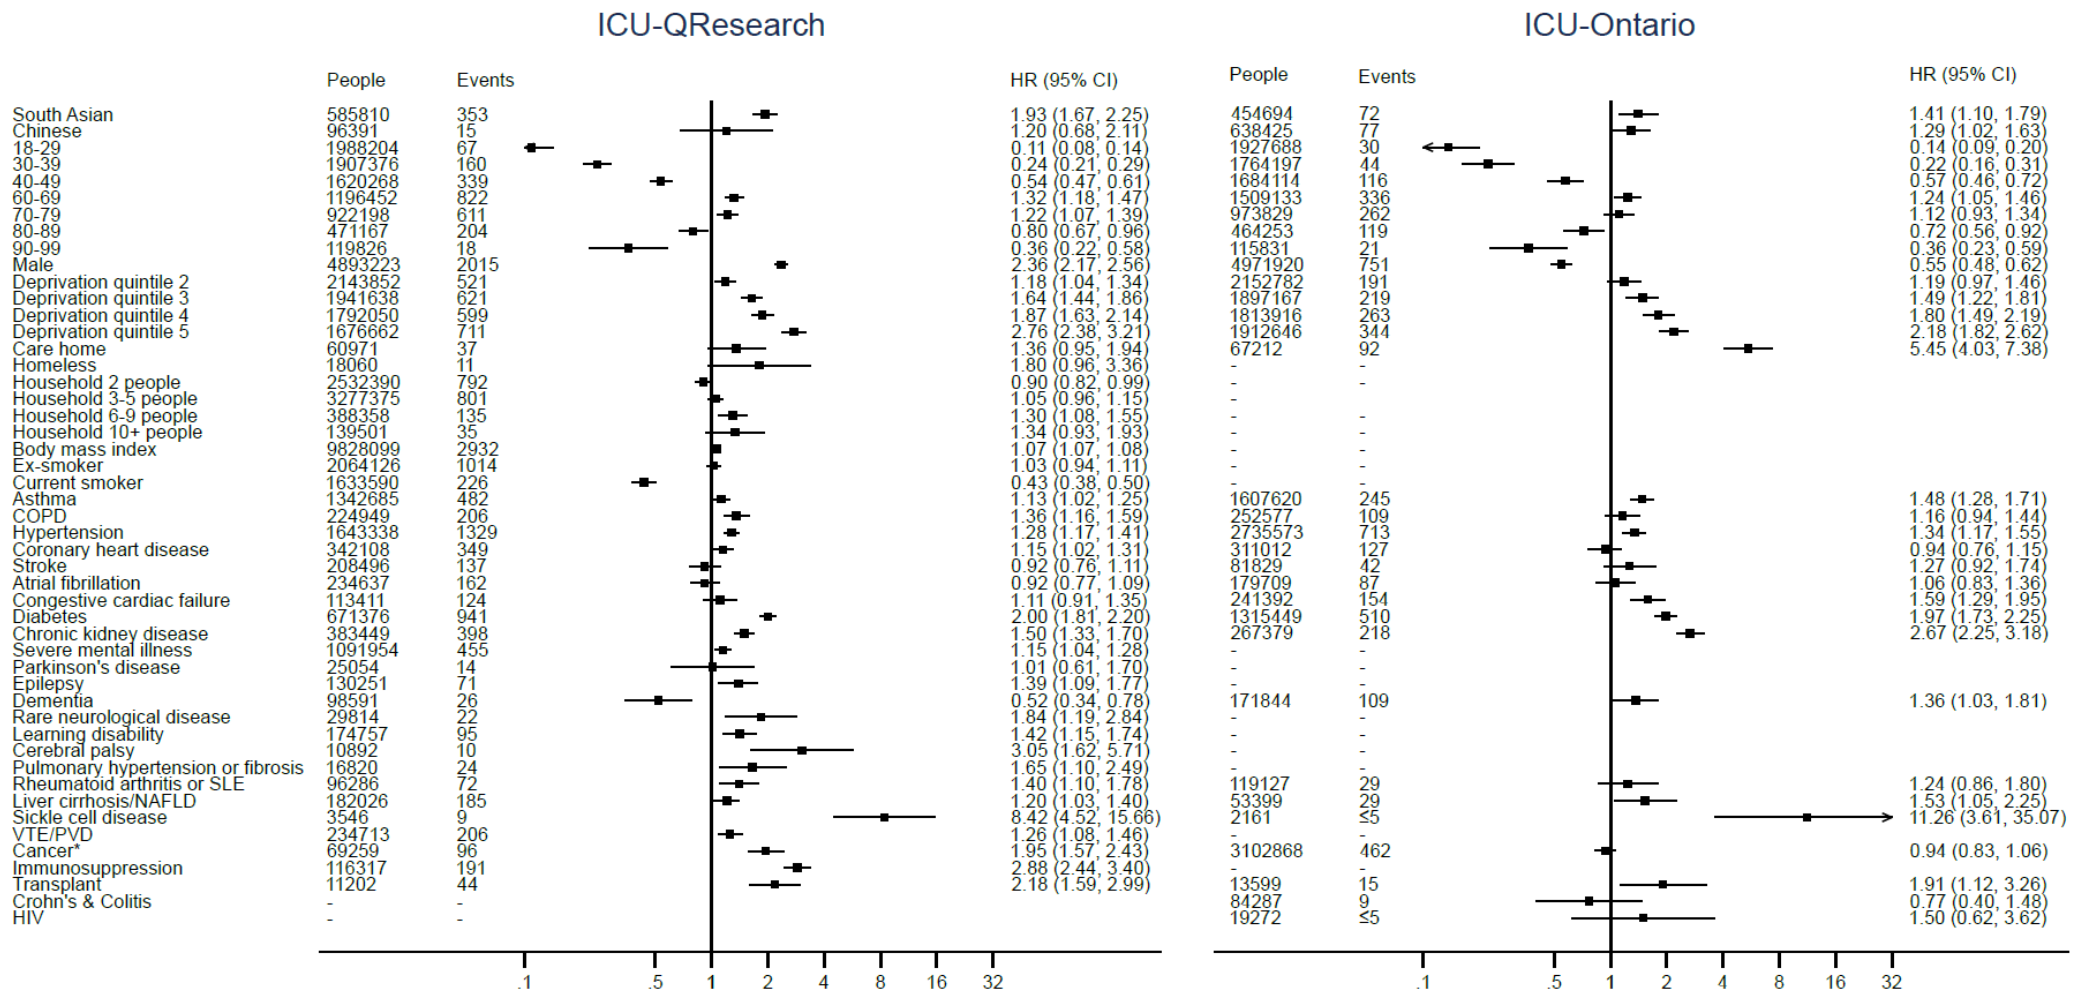

Number of events and participants refer to complete-case data (Table 1, Table S1 and Table S2)

Rheumatoid arthritis alone in Ontario cohort. \*Blood/respiratory cancer in QResearch, all cancer types in Ontario cohort.

The reference ethnic group is "general population": people not South Asian and Chinese - Ontario: approximately 80% White; QResearch; White, Other Asian, Black African, Black Caribbean, and Other. COPD – chronic obstructive pulmonary disease; SLE – systemic lupus erythematosus; NAFLD – Non-alcoholic fatty liver disease; VTE – venous thromboembolism; PVD – peripheral vascular disease; HIV – human immunodeficiency virus. Reference groups are: Ethnicity – White; Age – 50-59 years; Sex – Female; Deprivation – 1<sup>st</sup> quintile (least deprived); Residence – neither (QResearch), no long-term care resident (Ontario); Household size – 1 person; Smoking status – non-smoker. For body mass index (BMI, kg/m<sup>2</sup>), hazard ratio is reported per 1-unit increase. For all comorbidities, reference is no disease (for chronic kidney disease [CKD] it is CKD stage 1-2).



**Figure S4:** Comparison between multiple imputed and complete case results (QResearch cohort)

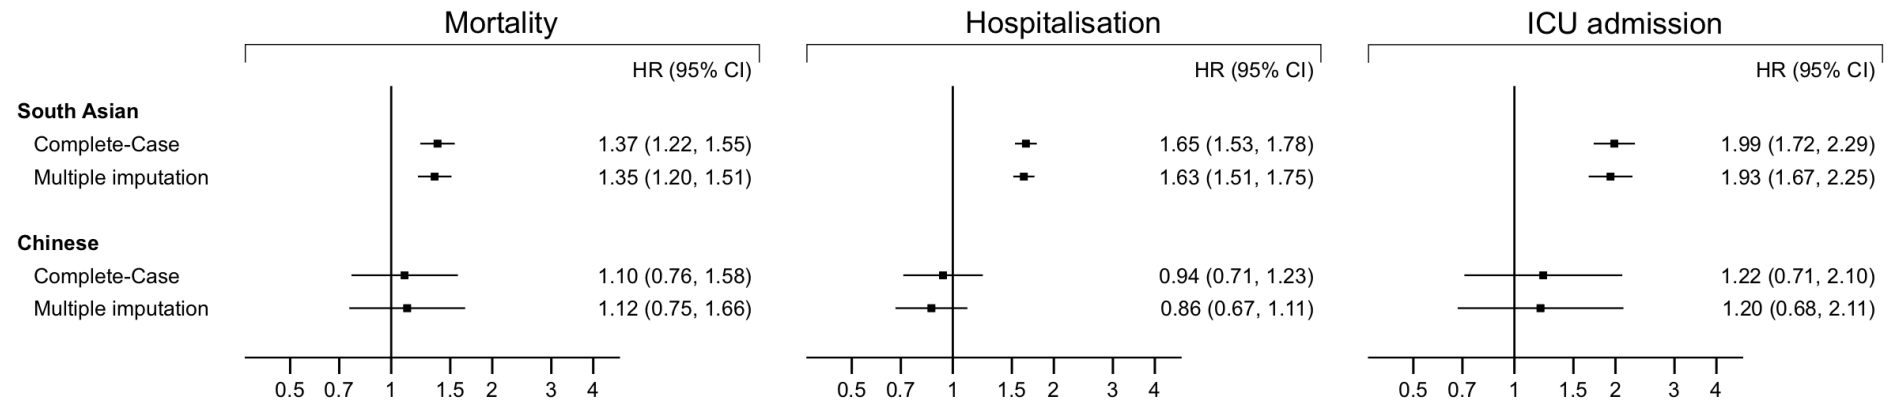

Number of events and participants are shown in Figure S1-S3 for complete case and Figure 1 following multiple imputation.

**Figure S5:** Time-varying hazard ratios of COVID-19 death and hospitalisation by ethnicity in the QResearch cohort

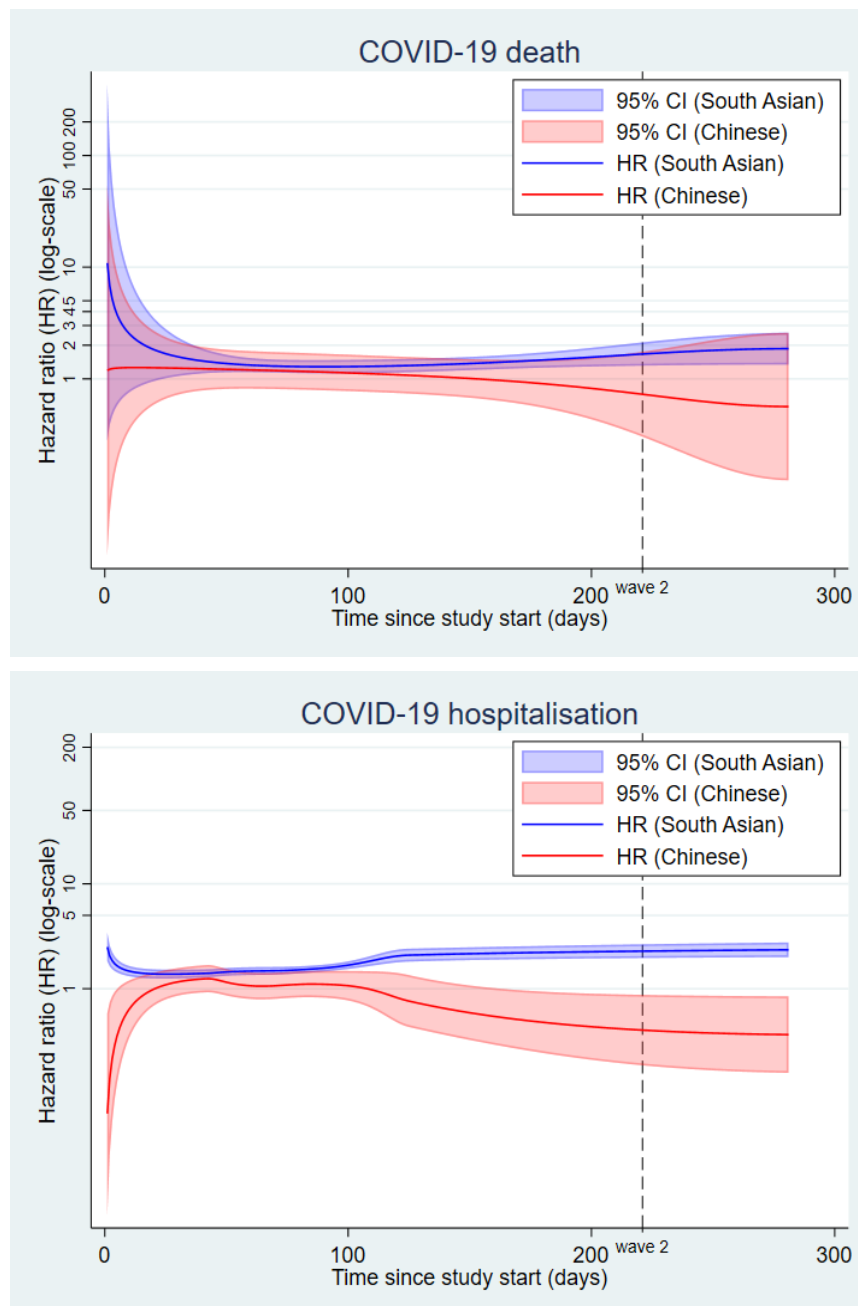

Areas indicate 95% CI. Dotted line represents the beginning of wave 2; wave 1: 24 January 2020 to 31 August 2020; wave 2: 1 September 2020 to 31 October 2020. Estimates from complete-case analysis.

Figure S6: COVID-19 related outcomes across deprivation status

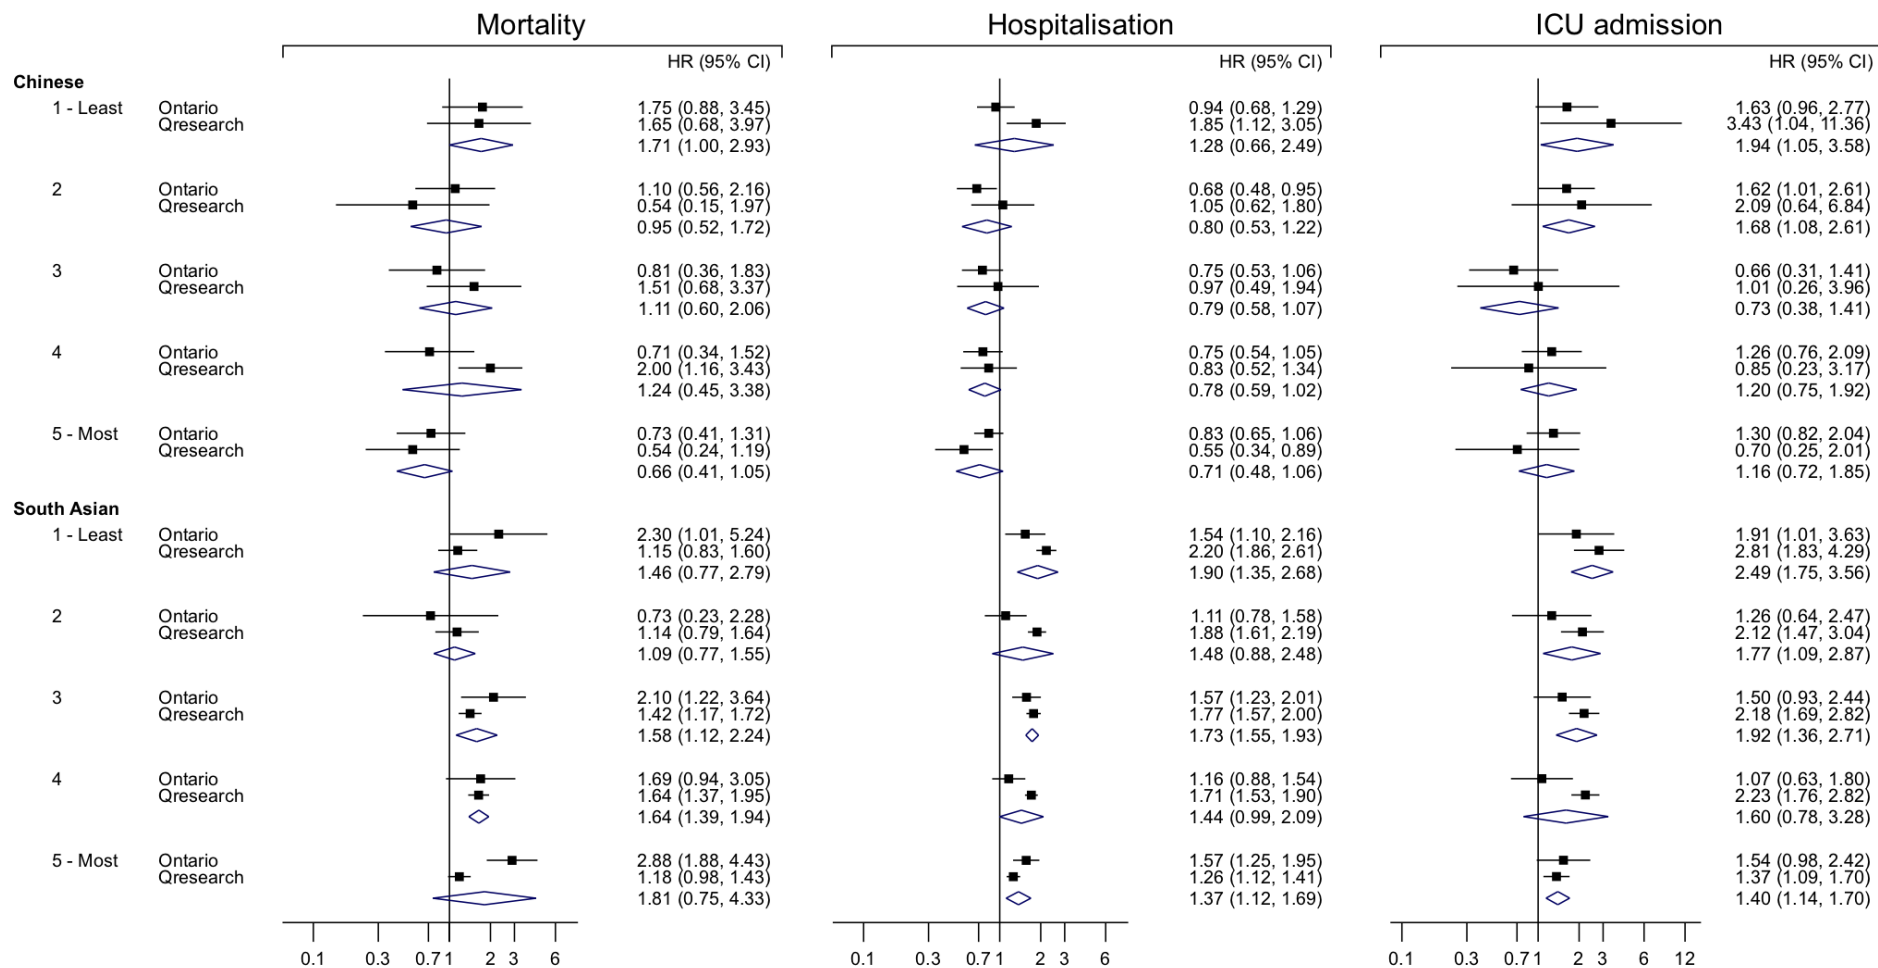

Hazard Ratios (HR) for each ethnic group are reported compared to the “General population” group

# Log-negative-log plots – assessment of proportional hazards assumption

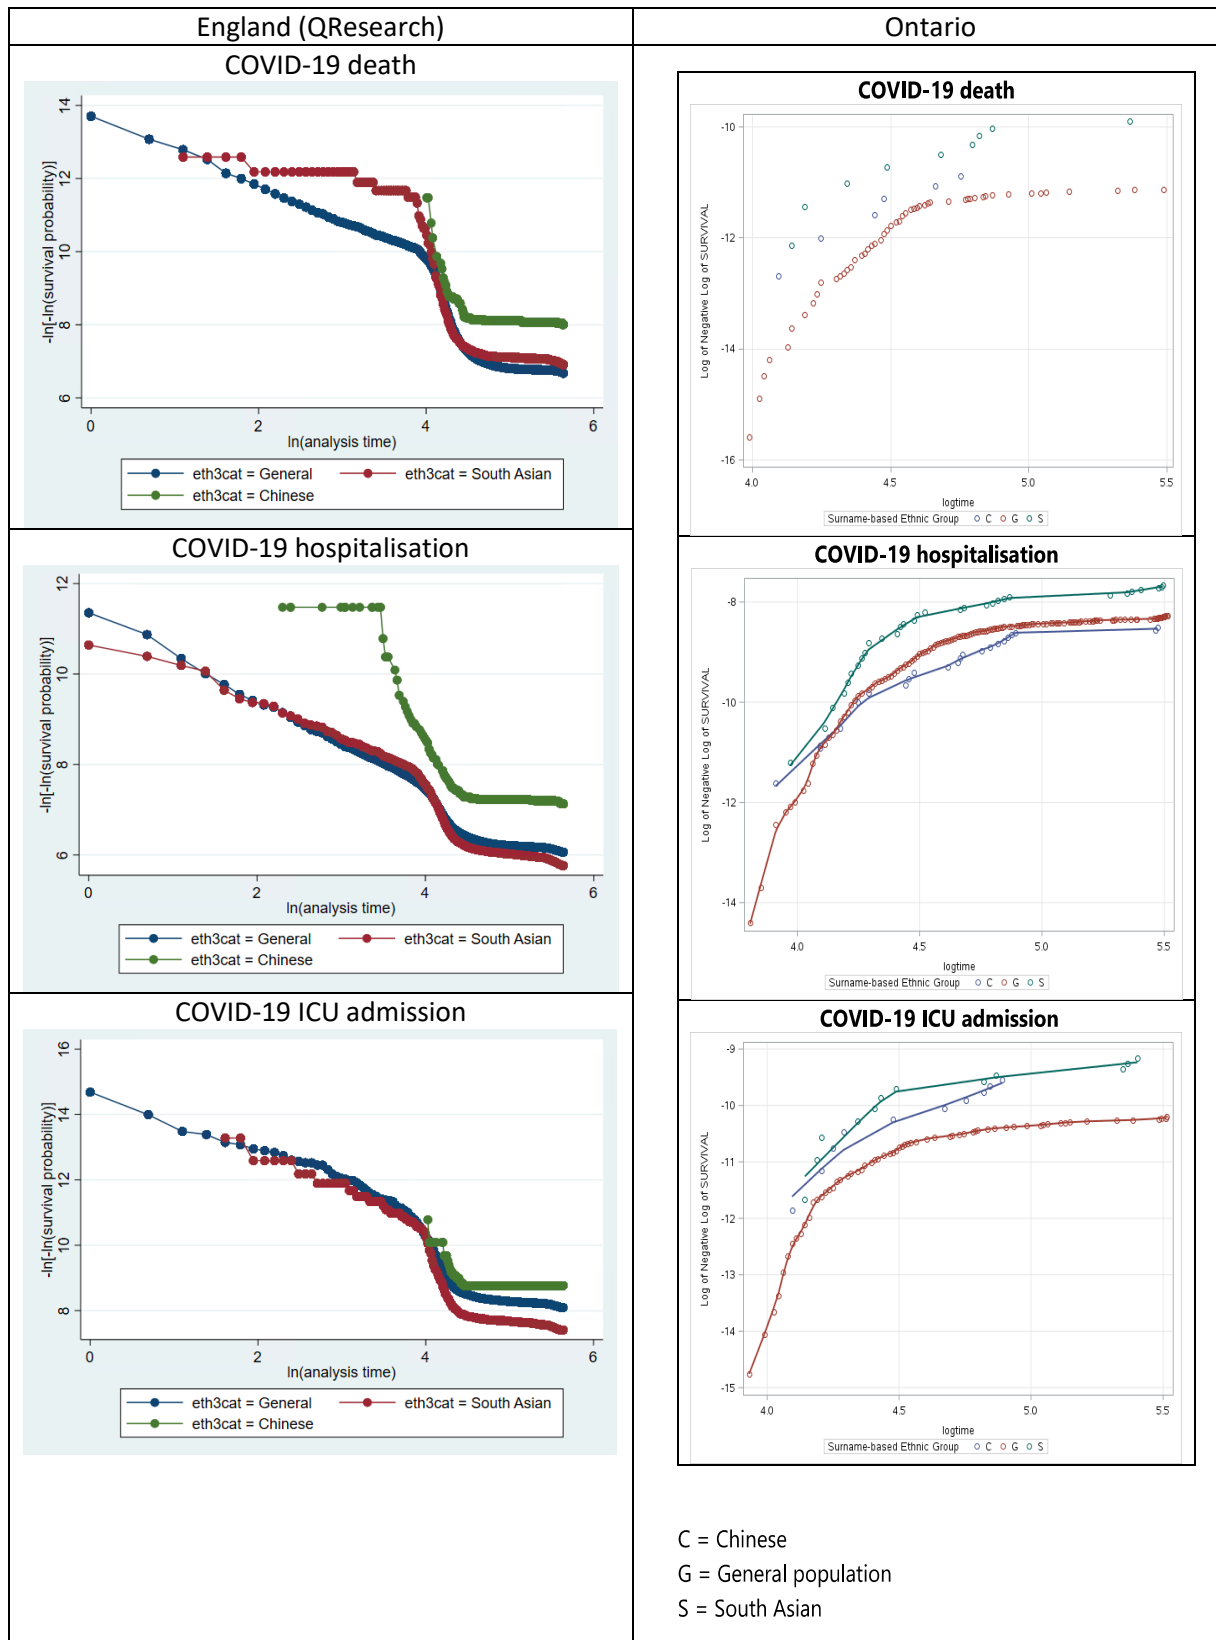

**The RECORD statement – checklist of items, extended from the STROBE statement that should be reported in observational studies using routinely collected health data.**

|                           | Item No. | STROBE items                                                                                                                                                                               | Location in manuscript where items are reported | RECORD items                                                                                                                                                                                                                                                                                                                                                                                                                                       | Location in manuscript where items are reported |
|---------------------------|----------|--------------------------------------------------------------------------------------------------------------------------------------------------------------------------------------------|-------------------------------------------------|----------------------------------------------------------------------------------------------------------------------------------------------------------------------------------------------------------------------------------------------------------------------------------------------------------------------------------------------------------------------------------------------------------------------------------------------------|-------------------------------------------------|
| <b>Title and abstract</b> |          |                                                                                                                                                                                            |                                                 |                                                                                                                                                                                                                                                                                                                                                                                                                                                    |                                                 |
|                           | 1        | (a) Indicate the study’s design with a commonly used term in the title or the abstract (b) Provide in the abstract an informative and balanced summary of what was done and what was found | Pages 1-2                                       | <p>RECORD 1.1: The type of data used should be specified in the title or abstract. When possible, the name of the databases used should be included.</p> <p>RECORD 1.2: If applicable, the geographic region and timeframe within which the study took place should be reported in the title or abstract.</p> <p>RECORD 1.3: If linkage between databases was conducted for the study, this should be clearly stated in the title or abstract.</p> | Page 1-2                                        |
| <b>Introduction</b>       |          |                                                                                                                                                                                            |                                                 |                                                                                                                                                                                                                                                                                                                                                                                                                                                    |                                                 |
| Background rationale      | 2        | Explain the scientific background and rationale for the investigation being reported                                                                                                       | Page 3                                          |                                                                                                                                                                                                                                                                                                                                                                                                                                                    |                                                 |
| Objectives                | 3        | State specific objectives, including any prespecified hypotheses                                                                                                                           | Page 3                                          |                                                                                                                                                                                                                                                                                                                                                                                                                                                    |                                                 |
| <b>Methods</b>            |          |                                                                                                                                                                                            |                                                 |                                                                                                                                                                                                                                                                                                                                                                                                                                                    |                                                 |
| Study Design              | 4        | Present key elements of study design early in the paper                                                                                                                                    | Page 4                                          |                                                                                                                                                                                                                                                                                                                                                                                                                                                    |                                                 |
| Setting                   | 5        | Describe the setting, locations, and relevant dates, including periods of recruitment, exposure, follow-up, and data collection                                                            | Page 4, Suppl. Material                         |                                                                                                                                                                                                                                                                                                                                                                                                                                                    |                                                 |
| Participants              | 6        | (a) <i>Cohort study</i> - Give the eligibility criteria, and the sources and methods of selection of participants. Describe methods of follow-up                                           | Page 4, Suppl. Material                         | <p>RECORD 6.1: The methods of study population selection (such as codes or algorithms used to identify subjects) should be listed in detail. If this is not possible, an explanation should be provided.</p> <p>RECORD 6.2: Any validation studies of the codes or algorithms used to select the population should be referenced. If</p>                                                                                                           | Page 4, Suppl. Material                         |

|                                  |    |                                                                                                                                                                                                                                                                                                                                              |                            |                                                                                                                                                                                                                                                                                                                                                             |                         |
|----------------------------------|----|----------------------------------------------------------------------------------------------------------------------------------------------------------------------------------------------------------------------------------------------------------------------------------------------------------------------------------------------|----------------------------|-------------------------------------------------------------------------------------------------------------------------------------------------------------------------------------------------------------------------------------------------------------------------------------------------------------------------------------------------------------|-------------------------|
|                                  |    |                                                                                                                                                                                                                                                                                                                                              |                            | validation was conducted for this study and not published elsewhere, detailed methods and results should be provided.<br><br>RECORD 6.3: If the study involved linkage of databases, consider use of a flow diagram or other graphical display to demonstrate the data linkage process, including the number of individuals with linked data at each stage. |                         |
| Variables                        | 7  | Clearly define all outcomes, exposures, predictors, potential confounders, and effect modifiers. Give diagnostic criteria, if applicable.                                                                                                                                                                                                    | Page 4, Suppl. Material    | RECORD 7.1: A complete list of codes and algorithms used to classify exposures, outcomes, confounders, and effect modifiers should be provided. If these cannot be reported, an explanation should be provided.                                                                                                                                             | Page 4, Suppl. Material |
| Data sources/<br>measurement     | 8  | For each variable of interest, give sources of data and details of methods of assessment (measurement). Describe comparability of assessment methods if there is more than one group                                                                                                                                                         | Pages 4, Suppl. Material   |                                                                                                                                                                                                                                                                                                                                                             |                         |
| Bias                             | 9  | Describe any efforts to address potential sources of bias                                                                                                                                                                                                                                                                                    | Pages 4                    |                                                                                                                                                                                                                                                                                                                                                             |                         |
| Study size                       | 10 | Explain how the study size was arrived at                                                                                                                                                                                                                                                                                                    | Page 4-6                   |                                                                                                                                                                                                                                                                                                                                                             |                         |
| Quantitative variables           | 11 | Explain how quantitative variables were handled in the analyses. If applicable, describe which groupings were chosen, and why                                                                                                                                                                                                                | Page 4, 5, Suppl. Material |                                                                                                                                                                                                                                                                                                                                                             |                         |
| Statistical methods              | 12 | (a) Describe all statistical methods, including those used to control for confounding<br>(b) Describe any methods used to examine subgroups and interactions<br>(c) Explain how missing data were addressed<br>(d) <i>Cohort study</i> - If applicable, explain how loss to follow-up was addressed<br>(e) Describe any sensitivity analyses | Pages 5, 6                 |                                                                                                                                                                                                                                                                                                                                                             |                         |
| Data access and cleaning methods |    | ..                                                                                                                                                                                                                                                                                                                                           |                            | RECORD 12.1: Authors should describe the extent to which the investigators had access to the database population used to create the study population.                                                                                                                                                                                                       | Pages 4-6, 12           |

|                   |    |                                                                                                                                                                                                                                                                                                                                                                                                                          |        |                                                                                                                                                                                                                                                                                                                    |                         |
|-------------------|----|--------------------------------------------------------------------------------------------------------------------------------------------------------------------------------------------------------------------------------------------------------------------------------------------------------------------------------------------------------------------------------------------------------------------------|--------|--------------------------------------------------------------------------------------------------------------------------------------------------------------------------------------------------------------------------------------------------------------------------------------------------------------------|-------------------------|
|                   |    |                                                                                                                                                                                                                                                                                                                                                                                                                          |        | RECORD 12.2: Authors should provide information on the data cleaning methods used in the study.                                                                                                                                                                                                                    |                         |
| Linkage           |    |                                                                                                                                                                                                                                                                                                                                                                                                                          |        | RECORD 12.3: State whether the study included person-level, institutional-level, or other data linkage across two or more databases. The methods of linkage and methods of linkage quality evaluation should be provided.                                                                                          | Page 5, Suppl. Material |
| <b>Results</b>    |    |                                                                                                                                                                                                                                                                                                                                                                                                                          |        |                                                                                                                                                                                                                                                                                                                    |                         |
| Participants      | 13 | (a) Report the numbers of individuals at each stage of the study ( <i>e.g.</i> , numbers potentially eligible, examined for eligibility, confirmed eligible, included in the study, completing follow-up, and analysed)<br>(b) Give reasons for non-participation at each stage.<br>(c) Consider use of a flow diagram                                                                                                   | Page 7 | RECORD 13.1: Describe in detail the selection of the persons included in the study ( <i>i.e.</i> , study population selection) including filtering based on data quality, data availability and linkage. The selection of included persons can be described in the text and/or by means of the study flow diagram. | Page 7                  |
| Descriptive data  | 14 | (a) Give characteristics of study participants ( <i>e.g.</i> , demographic, clinical, social) and information on exposures and potential confounders<br>(b) Indicate the number of participants with missing data for each variable of interest<br>(c) <i>Cohort study</i> - summarise follow-up time ( <i>e.g.</i> , average and total amount)                                                                          | Page 7 |                                                                                                                                                                                                                                                                                                                    |                         |
| Outcome data      | 15 | <i>Cohort study</i> - Report numbers of outcome events or summary measures over time                                                                                                                                                                                                                                                                                                                                     | Page 7 |                                                                                                                                                                                                                                                                                                                    |                         |
| Main results      | 16 | (a) Give unadjusted estimates and, if applicable, confounder-adjusted estimates and their precision ( <i>e.g.</i> , 95% confidence interval). Make clear which confounders were adjusted for and why they were included<br>(b) Report category boundaries when continuous variables were categorized<br>(c) If relevant, consider translating estimates of relative risk into absolute risk for a meaningful time period | Page 7 |                                                                                                                                                                                                                                                                                                                    |                         |
| Other analyses    | 17 | Report other analyses done— <i>e.g.</i> , analyses of subgroups and interactions, and sensitivity analyses                                                                                                                                                                                                                                                                                                               | Page 8 |                                                                                                                                                                                                                                                                                                                    |                         |
| <b>Discussion</b> |    |                                                                                                                                                                                                                                                                                                                                                                                                                          |        |                                                                                                                                                                                                                                                                                                                    |                         |

|                                                           |    |                                                                                                                                                                            |             |                                                                                                                                                                                                                                                                                                          |                          |
|-----------------------------------------------------------|----|----------------------------------------------------------------------------------------------------------------------------------------------------------------------------|-------------|----------------------------------------------------------------------------------------------------------------------------------------------------------------------------------------------------------------------------------------------------------------------------------------------------------|--------------------------|
| Key results                                               | 18 | Summarise key results with reference to study objectives                                                                                                                   | Page 9      |                                                                                                                                                                                                                                                                                                          |                          |
| Limitations                                               | 19 | Discuss limitations of the study, taking into account sources of potential bias or imprecision. Discuss both direction and magnitude of any potential bias                 | Page 10     | RECORD 19.1: Discuss the implications of using data that were not created or collected to answer the specific research question(s). Include discussion of misclassification bias, unmeasured confounding, missing data, and changing eligibility over time, as they pertain to the study being reported. | Page 9-11                |
| Interpretation                                            | 20 | Give a cautious overall interpretation of results considering objectives, limitations, multiplicity of analyses, results from similar studies, and other relevant evidence | Pages 10-11 |                                                                                                                                                                                                                                                                                                          |                          |
| Generalisability                                          | 21 | Discuss the generalisability (external validity) of the study results                                                                                                      | Pages 10-11 |                                                                                                                                                                                                                                                                                                          |                          |
| <b>Other Information</b>                                  |    |                                                                                                                                                                            |             |                                                                                                                                                                                                                                                                                                          |                          |
| Funding                                                   | 22 | Give the source of funding and the role of the funders for the present study and, if applicable, for the original study on which the present article is based              | Page 11     |                                                                                                                                                                                                                                                                                                          |                          |
| Accessibility of protocol, raw data, and programming code |    | ..                                                                                                                                                                         | Page 12     | RECORD 22.1: Authors should provide information on how to access any supplemental information such as the study protocol, raw data, or programming code.                                                                                                                                                 | Page 12, Suppl. Material |

Benchimol EI, Smeeth L, Guttman A, Harron K, Moher D, Petersen I, Sørensen HT, von Elm E, Langan SM, the RECORD Working Committee. The REporting of studies Conducted using Observational Routinely-collected health Data (RECORD) Statement. PLoS Med. 2015 Oct 6;12(10):e1001885. doi: 10.1371/journal.pmed.1001885.

Checklist is protected under Creative Commons Attribution ([CC BY](https://creativecommons.org/licenses/by/4.0/)) license.

Page numbers refer to the original, word document submission.
